# Supplementary material for: First achieving highly selective oxidation of aliphatic alcohols to aldehydes over photocatalysts
Source: Royal Society of Chemistry journal article supplement (doi:10.1039/c8ta03680b), 2018-01-01
Supplement: c8ta03680b1.pdf [file c8ta03680b1.pdf]

## SUPPLEMENTARY INFORMATION

### **First Achieving Highly Selective Oxidation of Aliphatic Alcohols to Aldehydes over Photocatalysts**

Feng Xie<sup>†, ‡</sup>, Yin Zhang<sup>‡</sup>, Xiao He<sup>‡</sup>, Hongdong Li<sup>‡</sup>, Xueying Qiu<sup>‡</sup>, Wencai Zhou<sup>‡</sup>,  
Shutong Huo<sup>§</sup>, Zhiyong Tang<sup>‡ \*</sup>

<sup>†</sup> Advanced Membranes and Porous Materials Center, Physical Sciences and Engineering Division, King Abdullah University of Science and Technology, Thuwal 23955-6900, Saudi Arabia

<sup>‡</sup> Chinese Academy of Sciences Key Laboratory of Nanosystem and Hierarchical Fabrication, National Center for Nanoscience and Technology, Chinese Academy of Sciences, Beijing 100190, P. R. China

<sup>§</sup> Department of Health Policy and Management, Yale School of Public Health, Yale University, New Haven, CT, 06520-8018, USA

\* Corresponding author. Email: [zytang@nanoctr.cn](mailto:zytang@nanoctr.cn)

**The PDF file includes:**

**Figure S1.** SEM image of single BiOBr microsphere and the corresponding EDX elemental mapping of Bi (green), O (blue), and Br (red). The scale bars on the Bi, O, and Br images are the same as that on the SEM image.

**Figure S2.** SEM image of single BiOI microsphere and the corresponding EDX elemental mapping of Bi (red), O (blue), and I (green). The scale bars on the Bi, O, and I images are the same as that on the SEM image.

**Figure S3.** (a) N<sub>2</sub> adsorption-desorption isotherms of BiOBr samples. (b) N<sub>2</sub> adsorption-desorption isotherms of BiOI samples.

**Figure S4.** (a) XPS survey spectrum of BiOCl, BiOBr, and BiOI. (b) Mott-Schottky plots of BiOCl samples. (c) Mott-Schottky plots of BiOBr samples. (d) Mott-Schottky plots of BiOI samples. **C** represents the capacitance, and **E** is the applied potential.

**Figure S5.** The cyclic voltammogram of alcohols (left) and aldehydes (right) with different concentrations (0.1, 0.2, and 0.5 mM).

**Figure S6.** GC result for 1-Hexanol selectively oxidation to Caproaldehyde over BiOCl under light irradiation at 25 °C.

**Figure S7.** GC result for 1-Hexanol selectively oxidation to Caproaldehyde over BiOCl without oxygen (N<sub>2</sub> atmosphere) under light irradiation at 25 °C.

**Figure S8.** MS spectrum of Valeraldehyde.

**Figure S9.** MS spectrum of Caproaldehyde.

**Figure S10.** MS spectrum of Heptaldehyde.

**Figure S11.** Photoreaction equipment of photocatalytic experiment process.

**Figure S12.** Fluorescence detection of the generated H<sub>2</sub>O<sub>2</sub> after oxidation reaction over BiOCl, BiOBr, and BiOI.

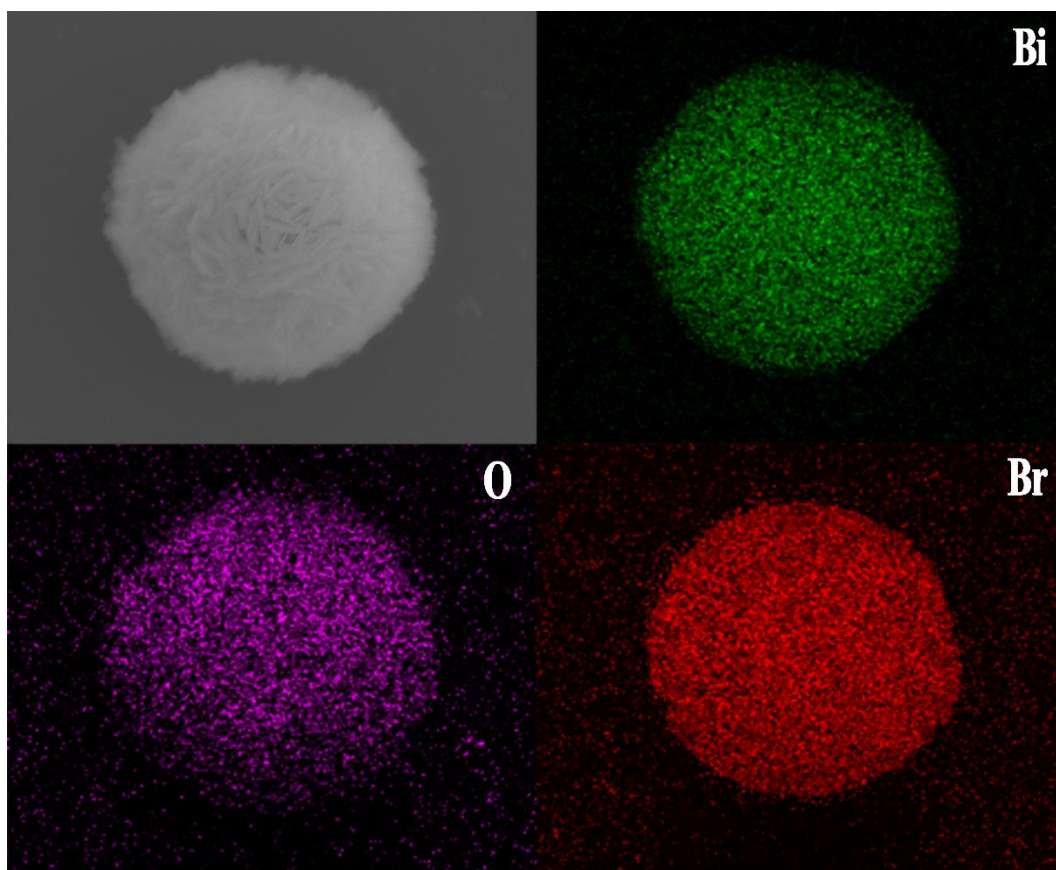

**Figure S1.** SEM image of a single BiOBr microsphere and the corresponding EDX elemental mapping of Bi (green), O (blue), and Br (red). The scale bars on the Bi, O, and Br images are the same as that on the SEM image.

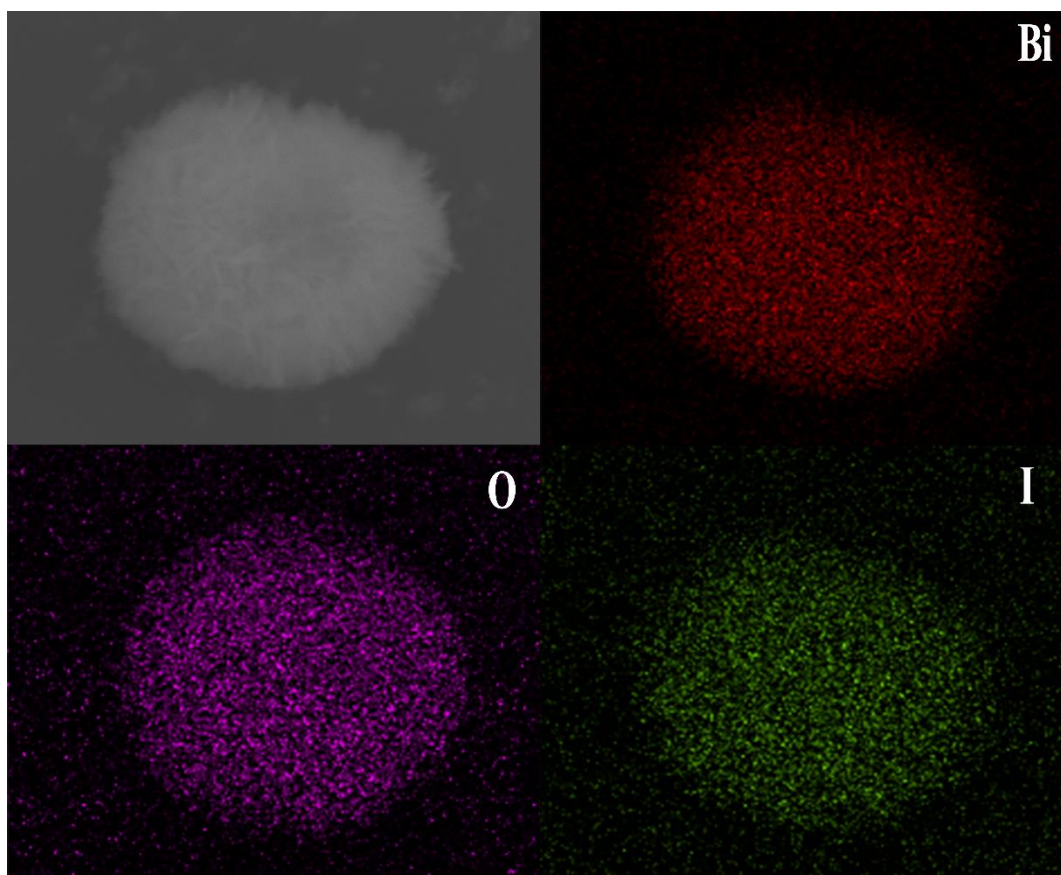

**Figure S2.** SEM image of a single BiOI microsphere and the corresponding EDX elemental mapping of Bi (red), O (blue), and I (green). The scale bars on the Bi, O, and I images are the same as that on the SEM image.

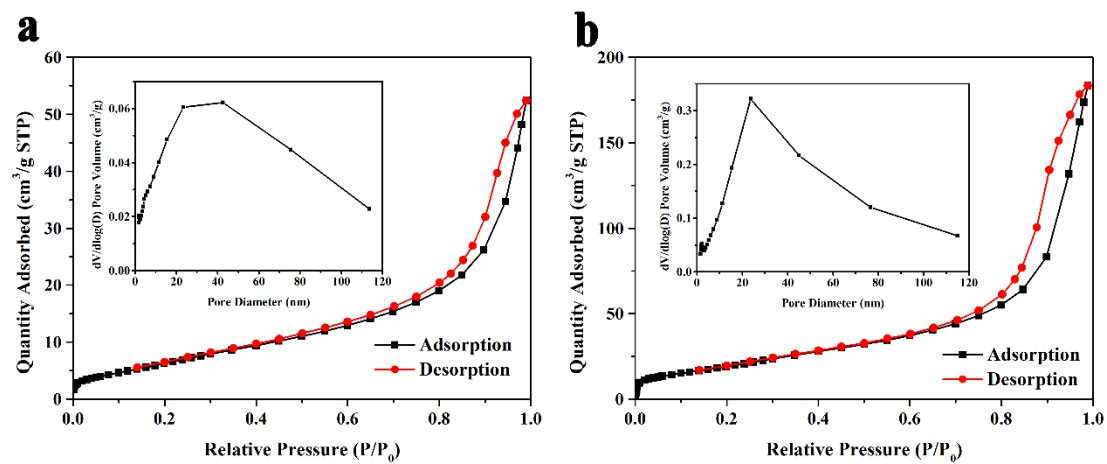

**Figure S3.** (a) N<sub>2</sub> adsorption-desorption isotherms of BiOBr samples. (b) N<sub>2</sub> adsorption-desorption isotherms of BiOI samples.

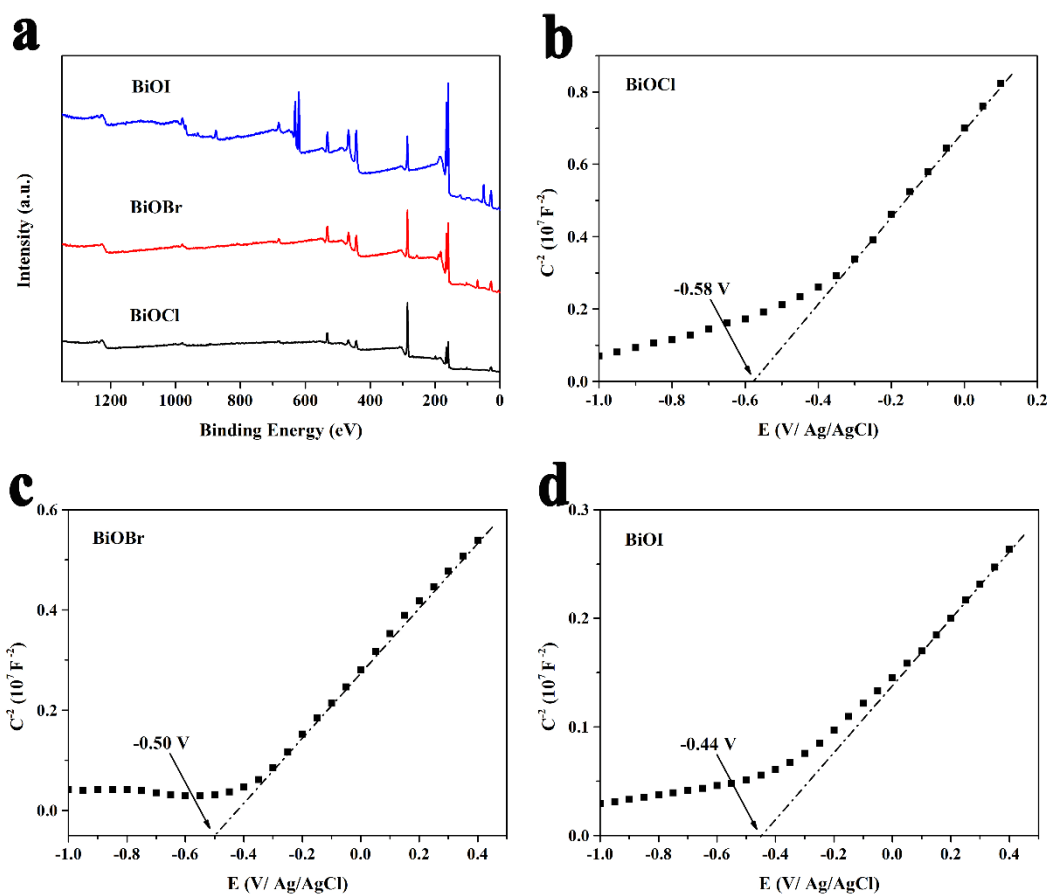

**Figure S4.** (a) XPS survey spectrum of BiOCl, BiOBr, and BiOI. (b) Mott-Schottky plots of BiOCl samples. (c) Mott-Schottky plots of BiOBr samples. (d) Mott-Schottky plots of BiOI samples. **C** represents the capacitance, and **E** is the applied potential.

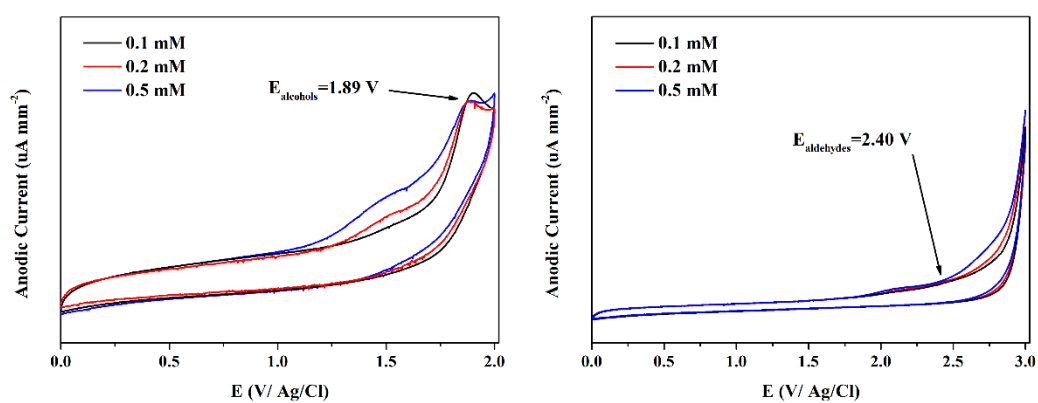

**Figure S5.** The cyclic voltammogram of alcohols (left) and aldehydes (right) with different concentrations (0.1, 0.2, and 0.5 mM).

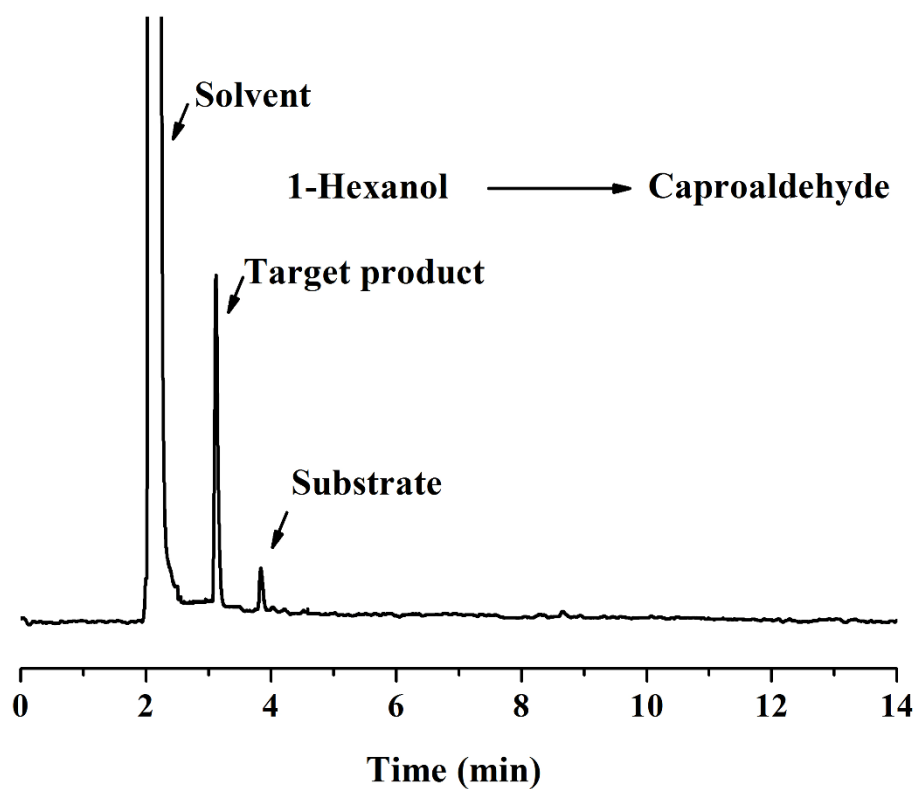

**Figure S6.** GC result for 1-Hexanol selectively oxidation to Caproaldehyde over BiOCl under light irradiation at 25 °C.



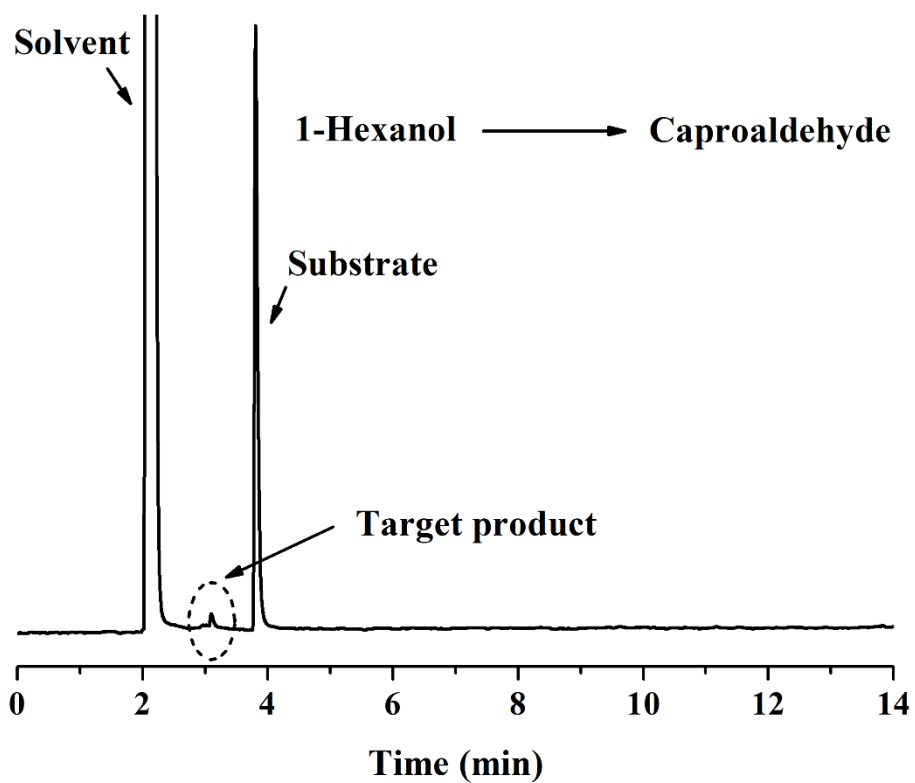

**Figure S7.** GC result for 1-Hexanol selectively oxidation to Caproaldehyde over BiOCl without molecular oxygen ( $N_2$  atmosphere) under light irradiation at 25 °C.

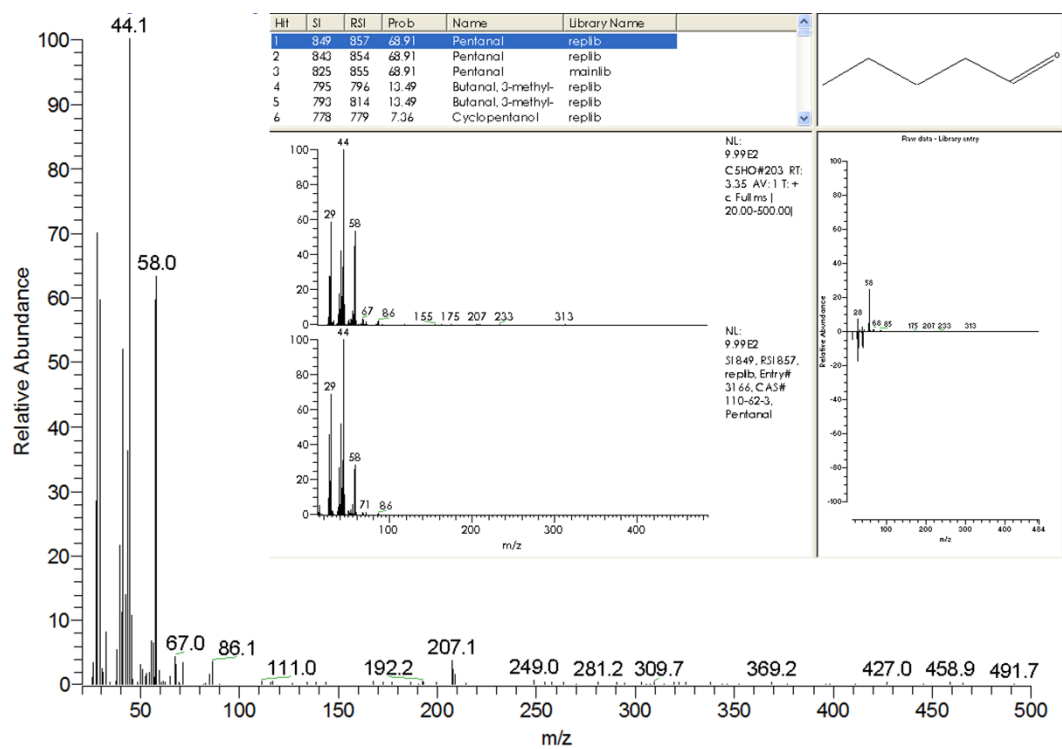

**Figure S8.** MS spectrum of Valeraldehyde.

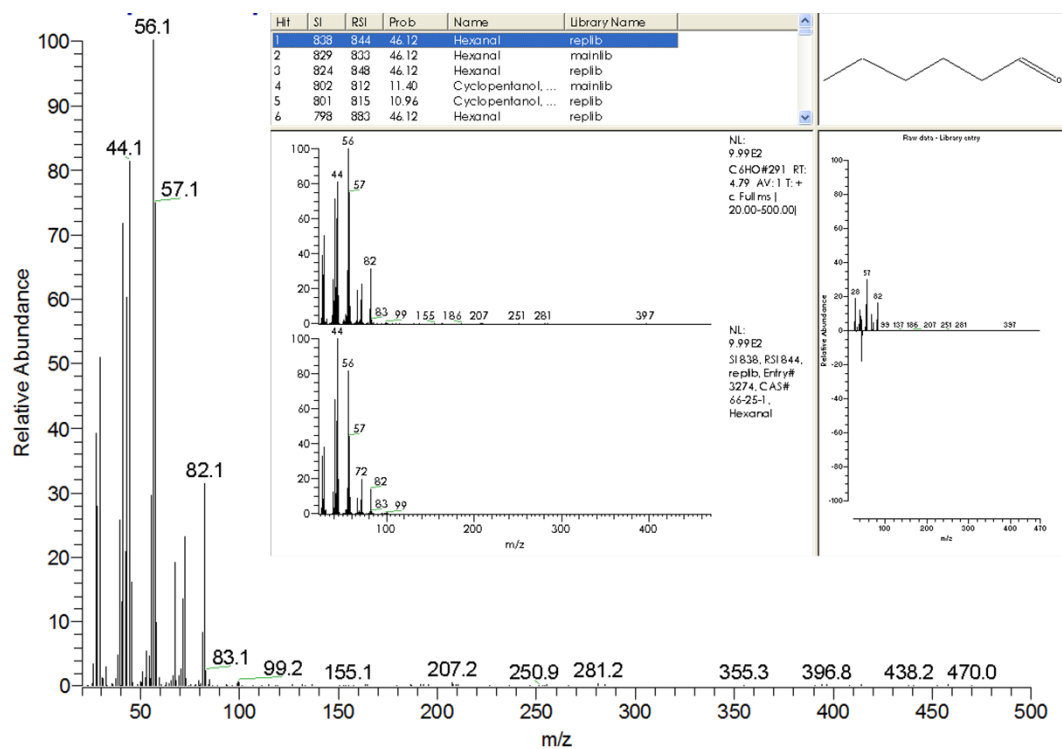

**Figure S9.** MS spectrum of Caproaldehyde.

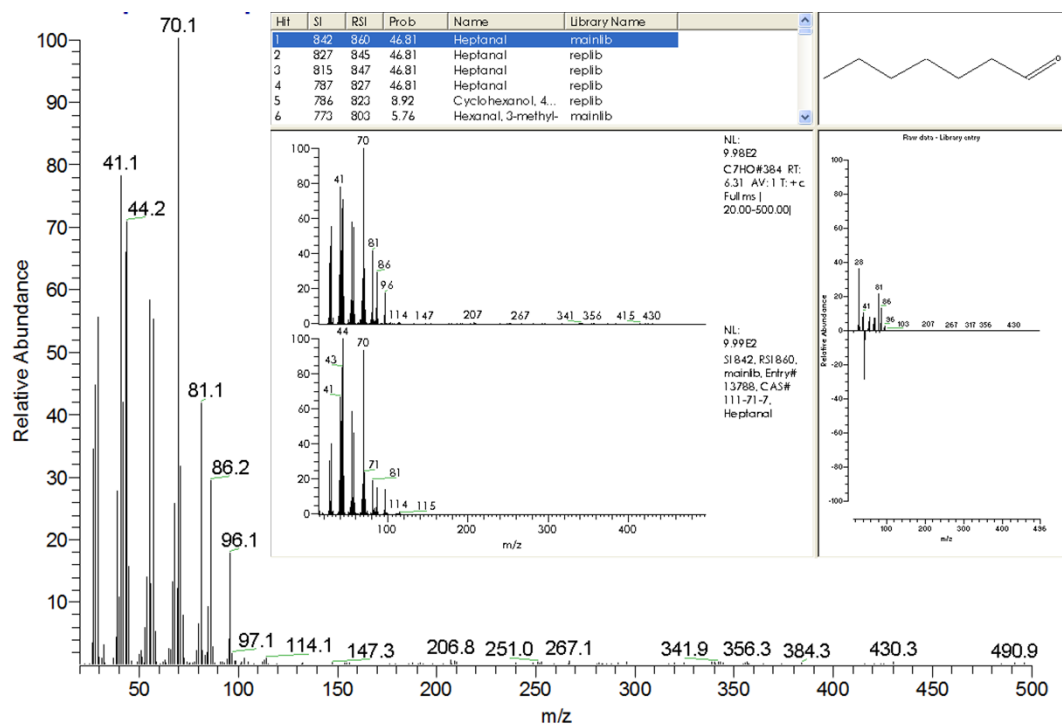

**Figure S10.** MS spectrum of Heptaldehyde.

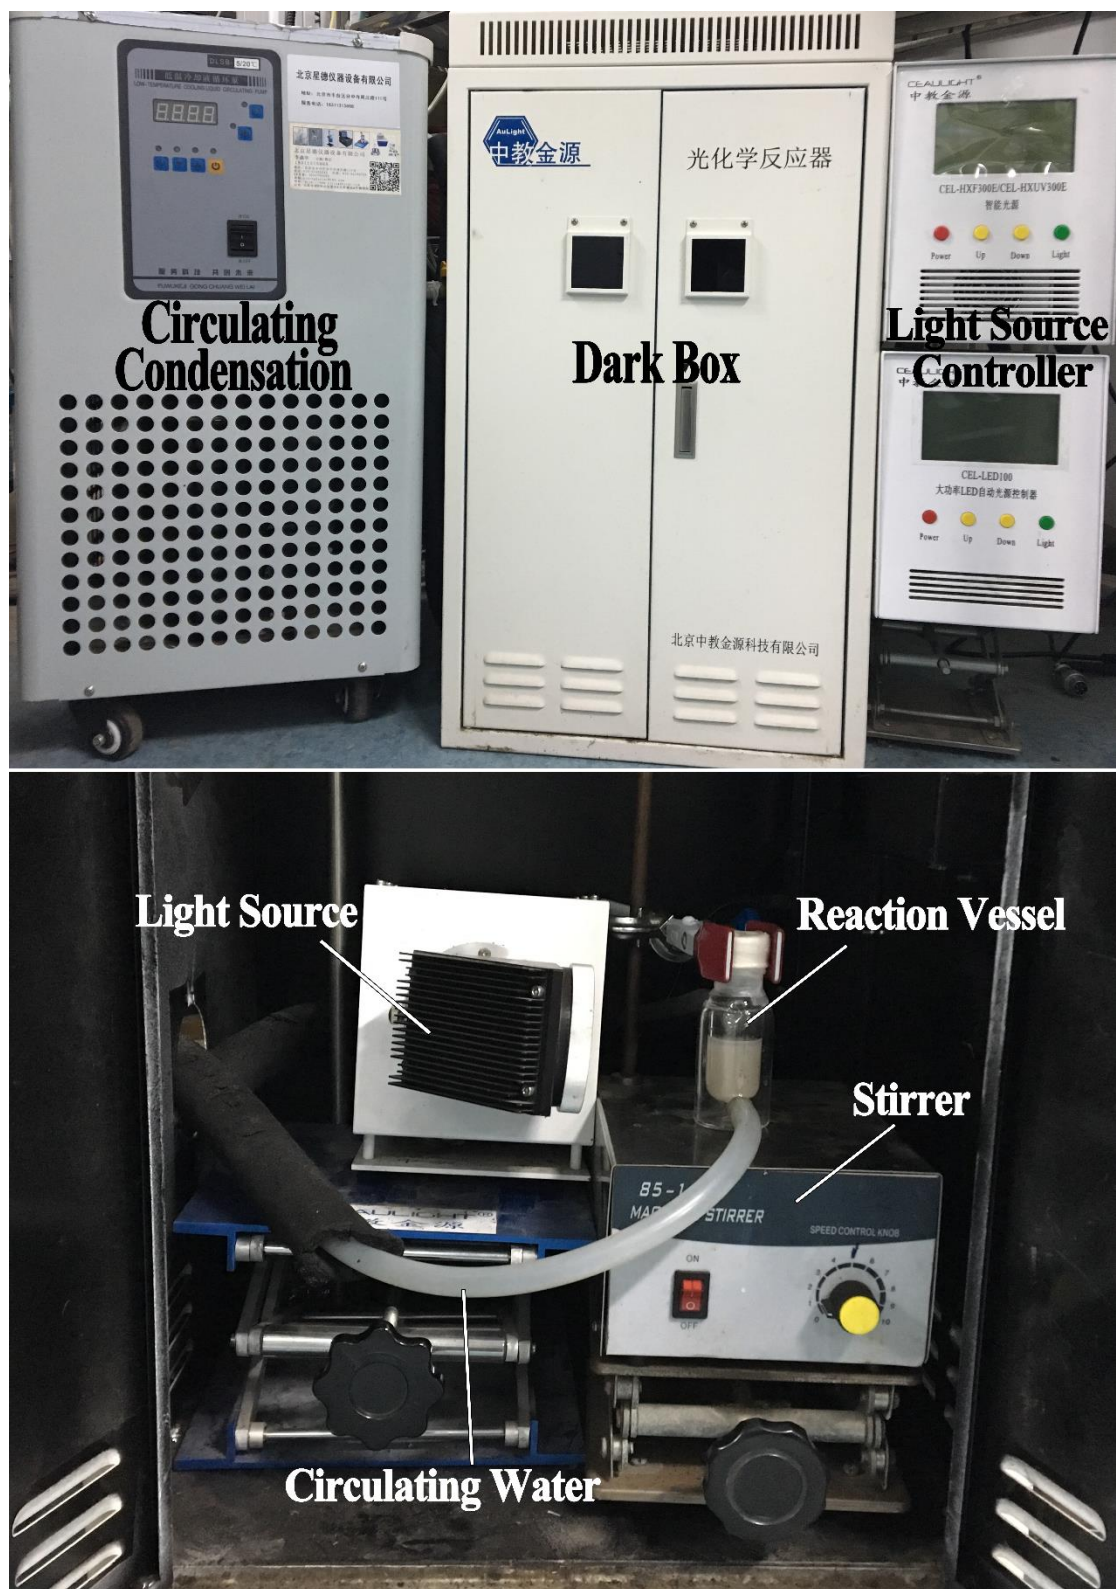

**Figure S11.** Photoreaction equipment of photocatalytic experiment process.

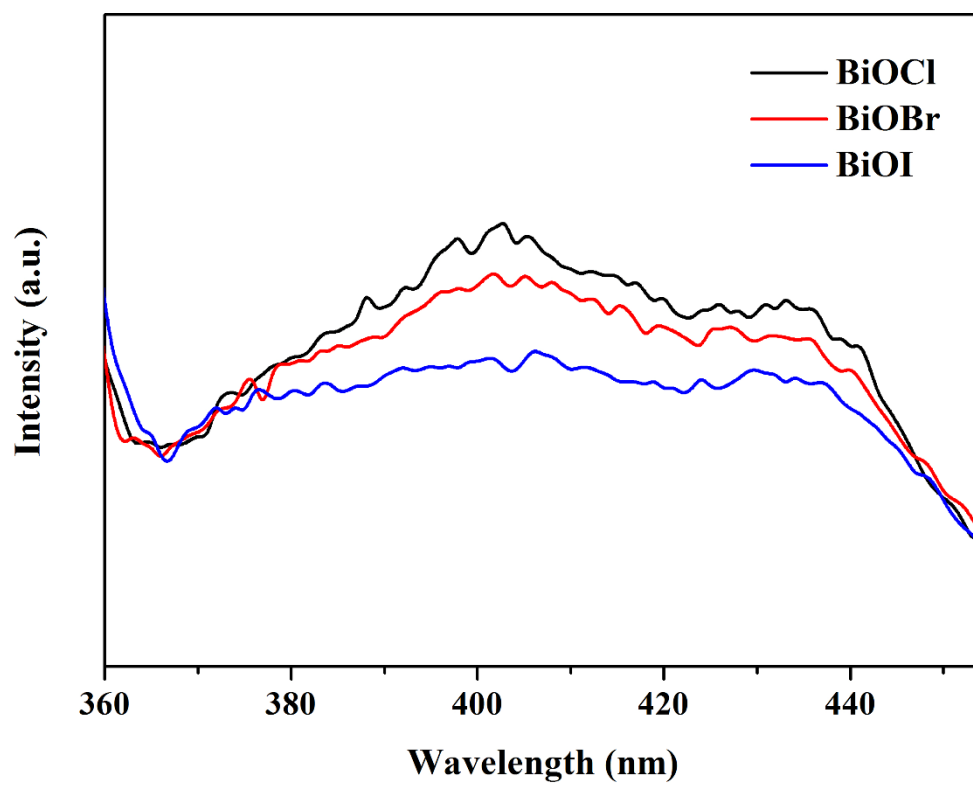

**Figure S12.** Fluorescence detection of the generated  $\text{H}_2\text{O}_2$  after oxidation reaction over BiOCl, BiOBr, and BiOI.
